# Supplementary material for: A multiomic analysis of in situ coral–turf algal interactions
Source: PubMed Central journal article supplement — Proc Natl Acad Sci U S A. 2020 Jun 1;117(24):13588–95. doi: 10.1073/pnas.1915455117 (PMC7306781; doi:10.1073/pnas.1915455117), 2020-06-01
Supplement: pnas.1915455117.sapp.pdf [file pnas.1915455117.sapp.pdf]

# PNAS

[www.pnas.org](http://www.pnas.org)

Supplementary Information for

A multi-omic analysis of *in situ* coral-turf algal interactions

Ty N.F. Roach, Mark Little, Milou G.I. Arts, Joel Huckeba, Andreas F. Haas, Emma E. George, Robert Quinn, Ana G. Cobián-Güemes, Douglas S. Naliboff, Cynthia Silveira, Mark J.A. Vermeij, Linda Wegley Kelly, Pieter C. Dorrestein, and Forest Rohwer

Ty Roach

Email: [smokinroachjr@gmail.com](mailto:smokinroachjr@gmail.com)

**This PDF file includes:**

Supplementary text  
Figures S1 to S20  
Tables S1 to S5  
SI References

**Other supplementary materials for this manuscript include the following:**

## **Supplementary Information Text**

### **Supplementary Methods:**

#### *Sample collection*

All samples were collected by divers on SCUBA in November 2015 around the island of Curaçao (12.1696° N, 68.9900° W). Samples for microscopy were taken by suctioning water and mucus directly off the surface of the coral, the algae, and the coral-algal interface using a 3 mL blunt tip syringe. Coral and algal samples were taken 10 cm away from the interface (Figure 1) by suctioning 100 µL of surface-associated water and mucus every 0.5 cm over a 10 cm transect parallel to the interface, yielding a total sample volume of 2 mL. A similar process was conducted along a 10 cm transect of the interface.

Biopsies for metagenomic and metabolomic analysis were taken using an underwater power drill (Nemo Power Tools, Santa Clara, CA, USA). Biopsies, 1 cm in diameter and 1 cm in length, were collected in a transect perpendicular to the coral-algal interface (Figure 1). The coral and algal samples were taken 10 cm away from the interface on their respective sides. The Interface samples were taken directly at the interface of the coral and turf algae. Biopsies for metabolomic analysis were placed into 10 mL of LCMS grade 70% methanol and 30% water for metabolite extraction and later analyzed via liquid chromatography tandem mass spectrometry (LC-MS/MS). Samples for Metagenomic analysis were placed in RNA Later (Thermo Fisher Scientific, Waltham, MA, USA) and stored at -80° C after 30 min.

#### *Epifluorescence microscopy*

Microscopy samples were divided into two aliquots in order to analyze both viral abundance and microbial size via SYBR and DAPI staining respectively. SYBR aliquots were fixed with microscopy grade paraformaldehyde at 1% final concentration, vacuum filtered onto a 0.02 µm Anodisc filter (Whatman Inc., Florham Park, NJ, USA), stained with SYBR Gold (5 X final concentration; Invitrogen, Carlsbad, CA, USA), and mounted on microscope slides. DAPI aliquots were fixed with microscopy grade glutaraldehyde at 2% final concentration, vacuum filtered onto a 0.2 µm Anodisc filter (Whatman Inc., Florham Park, NJ, USA), stained with DAPI (5 µg·mL<sup>-1</sup> final concentration; Invitrogen, Carlsbad, CA, USA), and mounted on microscope slides. The

stained filters were imaged using an epifluorescence microscope (excitation/emission: 358/461 nm) at 600x magnification and were quantified using *Image Pro* software (Media Cybernetics).

#### *Calculation of metabolic power output*

Metabolic power was calculated using the methods of McDole et al., 2012 (1). Briefly, whole organism metabolic rate ( $I$ ), defined as the amount of energy per unit time that an individual organism requires, was calculated using Equation 1:

$$I = i_0 M^\alpha e^{-E/kT}$$

Where  $i_0$  is the mass-independent normalization constant,  $M$  is the wet weight of the organism in grams, and  $\alpha$  is the scaling exponent. The effects of temperature on metabolic rate are accounted for by  $e^{-E/kT}$  where  $E$  is the activation energy,  $k$  is Boltzmann's constant ( $8.62 \times 10^{-5} \text{ eV} \cdot \text{K}^{-1}$ ), and  $T$  is the water temperature (in Kelvin) at the site at the time of collection. Community-level metabolic rates were calculated by summing the individual metabolic rates ( $I$ ) for all microbes in a sample.

#### *Metagenome generation and analysis*

Total DNA was extracted from coral punches using the AllPrep DNA/RNA kit (Qiagen). Metagenomic libraries were constructed using Illumina Nextera XT library preparation kits and sequenced at the SDSU sequencing facility via 96-plex sequencing with 600 cycles using the MiSeq platform with 2 x 300 pair-end read chemistry. Raw reads were quality-filtered by removing short reads (<60 bp), reads with quality scores <20, reads with >1% ambiguous bases, low complexity reads (entropy>70), and duplicate reads, using the program PRINSEQ (2). Quality filtered metagenomic libraries were aligned using SUPERFOCUS (3) and the SEED hierarchical database of BLASTX-translated protein orthologs classified according to putative functional families (4). Relative abundances of taxa and functional gene classifications within each metagenome were used as input to the multivariate statistical and distance-based analyses described in the *statistical analysis* section.

Shotgun sequence metagenomic libraries generated a total of 19,388,513 raw reads with an average of 1,077,140 reads per sample ( $\pm$  148,402 raw reads per sample). This resulted in 18,819,251 quality-filtered reads with an average of 1,045,514 quality-filtered reads per sample ( $\pm$

144,414 reads) of which an average of 12.3% ( $\pm 3\%$ ) were bacterial and  $< 0.5\%$  ( $\pm 0.07\%$ ) were non-bacterial microbes. More information and statistics on metagenomic libraries can be found in Table S3.

#### *Bioinformatics search for prophage in metagenomes*

Unassembled metagenomic reads were queried using Fragment Recruit Assembly Purification (FRAP, <https://github.com/yinacobian/frap>) against a prophage protein database and bacterial genome reference dataset. FRAP uses the SMALT pairwise sequence alignment program where we chose an  $\geq 80\%$  nucleotide identity for the complete query read against both databases (5). The prophage protein dataset consisted of 1.5 million contigs from PhiSpy predicted proteins in the NCBI RefSeq database and the bacterial genome database contained 66,000 complete bacterial genomes from NCBI RefSeq (6,7). Our metric for percent prophage was determined by dividing the number of hits to the PhiSpy predicted protein database by the hits to the NCBI bacterial genome reference set.

#### *Ultra-Performance Liquid Chromatography – Tandem Mass Spectrometry*

The extracted metabolites were separated with UltiMate 3000 Ultra-Performance Liquid Chromatography (UPLC) system (Thermo Scientific) using a Kinetex™ 1.7mm C18 reversed phase UHPLC column (50 mm x 2.1 mm). The gradient used for the chromatographic separation consists of two solvents, solvent A (2% acetonitrile and 98% of 0.1% formic acid in LC-MS grade water) and solvent B (98% acetonitrile and 2% of 0.1% formic acid in LC-MS grade water). The gradient started with 90%-10% of solvent A and B respectively for 1.5 minutes followed by a step wise gradient change of 10% every 30 sec. for 2 minutes. Then the 50%-50% mixture was held for 2 min., followed by the increase of solvent B from 50% (50%-50%) to 100% (0%-100%) in 6 min. The 100% solvent B was held for 30 sec. Within the next 30 sec., the mixture changed from 0%-100% to a 90%-10% mixture and was kept at this mixture for another 30 sec. Throughout the run, the flow rate was kept constant at  $0.5 \text{ mL} \cdot \text{min}^{-1}$ .

A Maxis Q-TOF mass spectrometer (MS) (Bruker Daltonics) was coupled to the UPLC system, directly measuring the compounds coming off the LC-column. The spectrometer was equipped with an electrospray ionization (ESI) source ( $200 \text{ }^\circ\text{C}$ ). Positive ion mode acquired MS

spectra in the range of 50 – 2000 m/z. Prior to data collection, the spectrometer was externally calibrated with ESI-L Low Concentration Tuning Mix (Agilent technologies, Santa Clara, CA, USA). Throughout runs, Hexakis (1H,1H,3H-tetrafluoropropoxy) phosphazene (Synquest Laboratories, Alachua, FL, USA; m/z 922.0098) was used as the internal calibrant. Both MS1 and MS2 had a nebulizer gas pressure (nitrogen) of 2 bar, dry gas flow of 9 L·min<sup>-1</sup> source temperature, and a capillary voltage of 4500 V. MS1 had a spectral rate of 3 Hz, and MS2 a spectral rate of 10 Hz. To obtain MS/MS fragmentation, the ten most intense ions per MS1 scan were introduced into the MS2, where they were fragmented using collision-induced dissociation. Automatic exclusion was used where an ion would be ignored in more than 3 scans, but when intensity was 2.5x the previous scan it would be re-fragmented.

#### *Feature Table Generation*

The raw datafiles from the MS machine were converted into .mzXML files with the Bruker Data Analysis software version 4.1. The .mzXML files are available on the MassIVE database ([massive.ucsd.edu](http://massive.ucsd.edu)) under number MSV000080597 and MSV000080632 (same dataset). The .mzXML files were imported into MZmine (8). Mass detection threshold for MS1 was 3.00E+03, and 1.00E+02 for MS2. For building the chromatogram a minimum peak height of 6.00E+03, with a minimum peak duration of 1.00E-2 was set, together with a mass error of 2.50E+01 ppm, and 5.00E-02 m/z. For deconvolution, we used a baseline cutoff, with the minimum peak height of 4.00E+03, peak duration range of 0.01 to 3 min., and a baseline level of 1.00E+03. The m/z range for MS2 scan paring was set to 5.00E-02 Da, and the retention time range was set to 0.2 min. Isotope peaks were grouped with the m/z tolerance set to 5.00E-02 or 25 ppm, and a retention time tolerance of 0.1 and a maximum charge of 4. The representative isotope would be the most intense one. Features of different samples are aligned with an m/z tolerance of 5.00E0.2 m/z or 25 ppm with a weight for m/z of 75. Retention time tolerance for alignment was set to 0.1 with a weight of 25. The peak list is filtered for a minimum of 2 peaks in a row, and 2 peaks in an isotope pattern. Only peaks with an MS2 scan were kept. Duplicated peaks were filtered out using the m/z tolerance of 5.00E-02 m/z or 25 ppm, and a retention time tolerance of 0.1. Gap filling occurred with an intensity tolerance of 10%, m/z tolerance of 5.00E-

02 m/z or 25 ppm, and a retention time tolerance of 0.15. The data was exported into a .CSV file (feature table) and a .mgf file for GNPS.

#### *Molecular Network Generation*

Molecular networks were created on GNPS using the molecular networking workflow with a cosine score above 0.65 and more than 4 matched peaks. Further edges between two nodes were kept in the network if and only if each of the nodes appeared in each other's respective top 20 most similar nodes. The spectra in the network were then searched against GNPS's spectral libraries. The library spectra were filtered in the same manner as the input data. All matches kept between network spectra and library spectra were required to have a score above 0.7 and at least 4 matched peaks. The GNPS buckettable was downloaded after network analysis and spectral intensities used to identify differential metabolites between coral, algae and interface. The molecular network used to identify the ceramide molecule is available here:

<https://gnps.ucsd.edu/ProteoSAFe/status.jsp?task=15cfb993ddb24c4986f40c62510b9661>.

#### *Molecular Formula assignment and calculation of Nominal Oxidation State of Carbon*

For formula assignment the .mgf file generated by MZMine2 (9) was imported into SIRIUS 4.0.1 (<https://bio.informatik.uni-jena.de/sirius/>) for molecular structure identification. SIRIUS 4.0.1 was used to generate putative molecular formulas with an allowed mass deviation of 0.0020 ppm. The formula with the highest probability (nr 1 predictor as identified by SIRIUS 4.0.1) was used to calculate the Nominal Oxidation State of Carbon (NOSC) as described in Graham et al., 2017 (10) using:

$$NOSC = - \left( \frac{-Z + 4a + b + 3c - 2d + 5e - 2f}{a} \right) + 4$$

where *a*, *b*, *c*, *d*, *e*, and *f* are the numbers of C, H, N, O, P, and S atoms respectively in a given organic molecule and *Z* is net charge of the organic molecule. These NOSCs were then used to calculate the Gibbs Free Energy of Carbon Oxidation ( $\Delta G^{\circ}_{\text{CO}_x}$ ) of these compounds using the methods described in LaRowe and Van Cappellen, 2011 (11).

#### *Statistical Analysis*

All tests were conducted with an alpha of 0.05 (95% confidence level). A one-way analysis of variance (ANOVA) followed by a Tukey *post hoc* analysis were used to test for

significant differences in viral abundance, bacterial abundance, bacterial size, bacterial metabolic power output, virus to microbe ratio, bacterial taxa, functional genes, NOSCs,  $\Delta G^{\circ}_{\text{COX}}$ , and ceramide abundance by treatments (i.e., an effect of coral, algae, interface). Data were further analyzed with linear regression comparing log (viral abundance) and virus to microbe ratio to log (bacterial abundance) and comparing cell division genes and total bacterial biomass to the *Bacteroidetes* to *Firmicutes* ratio. All the aforementioned statistical analyses were performed using JMP 14 software (SAS Software). All dendrograms were produced using the Wards hierarchical clustering function in JMP 14. Two-way dendrogram heat maps, were produced by using the two-way clustering function in JMP 14.

All random forests analyses were performed in R using the 'rfPermute' in combination with the 'randomForest' package (12). In supervised random forests, the competition outcome (i.e., winning or losing) of each sample was given and used for the learning process to identify winning or losing samples based on the metabolomic, taxonomic, and functional gene data. Supervised random forests were done within a group of samples identified as either coral, algae, or interface. The variable importance plots (VIPs) from the random forests were used to identify the molecules, taxa, and functional genes that best distinguished winning and losing interactions within the three groups (i.e., coral, algae, interface). The top ten variables from each VIP was used to construct two-way dendrograms for distinguishing winning and losing interactions in each sample type in JMP 14.

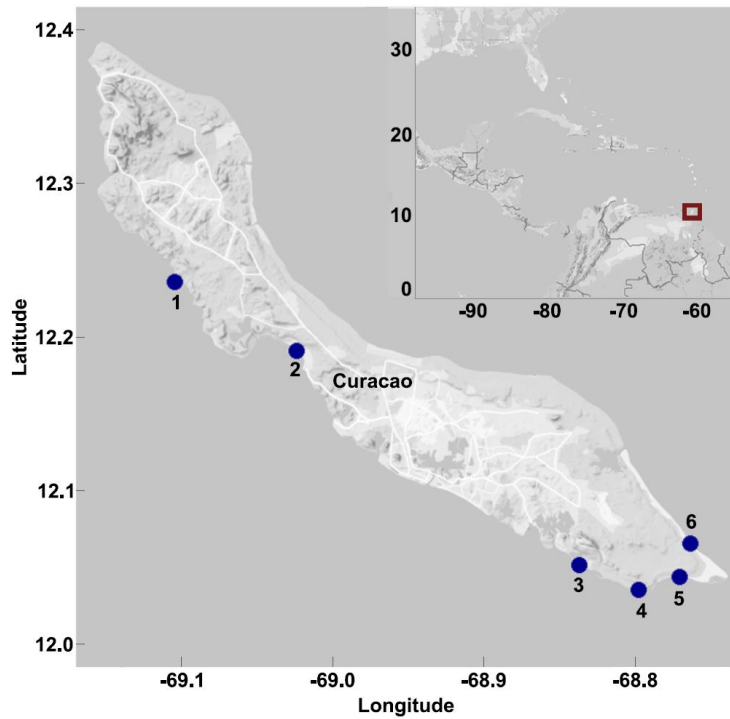

**Figure S1: Map of sampling sites around the island of Curaçao.** Surface-associated samples were taken at each site by suction from the surface of the coral, the algae, and the interface over a 10 cm transect parallel with the interface. Tissue samples were taken at each site using an underwater power drill taking a biopsy 1 cm in diameter and 1 cm in depth. All samples were taken from coral-algal interactions at a 10-15 m depth.



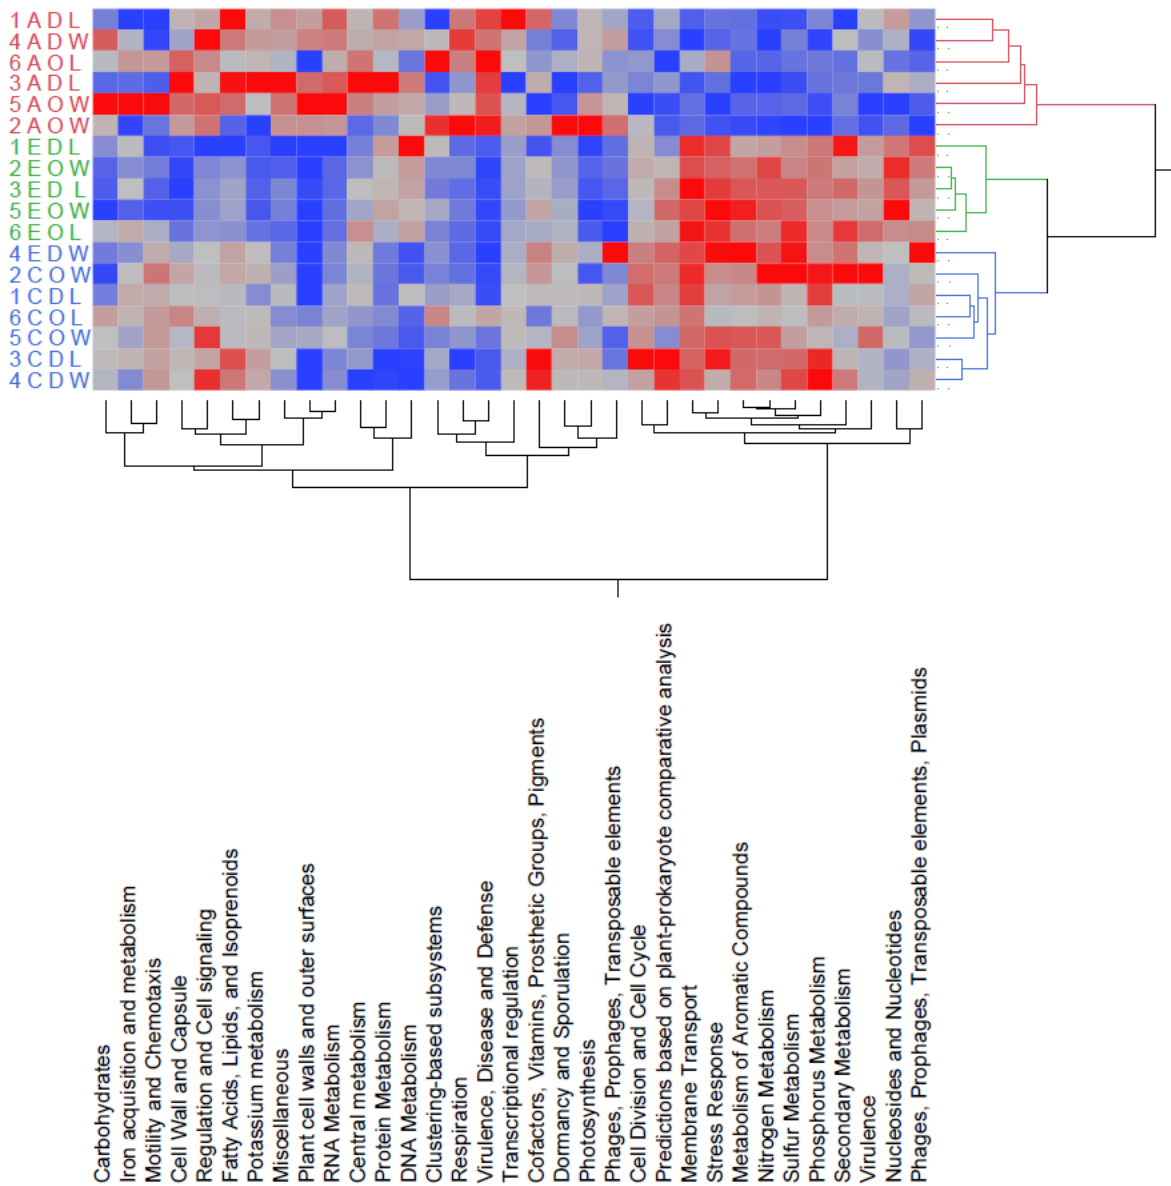

**Figure S2.** Two-way heat map constructed using functional genes at level 1 of the SEED hierarchical database. Green, red, and blue branches represent the three significant clusters. The branch tips are labeled to describe the site number (1-6), the sample type (C: coral, I: interface, A: algae), the type of coral (D = *D. stigosa*, O = *O. faveolata*, and whether the coral in the interaction was winning (W) or losing (L). Redder indicates relatively higher abundances and bluer indicates relatively lower abundances.

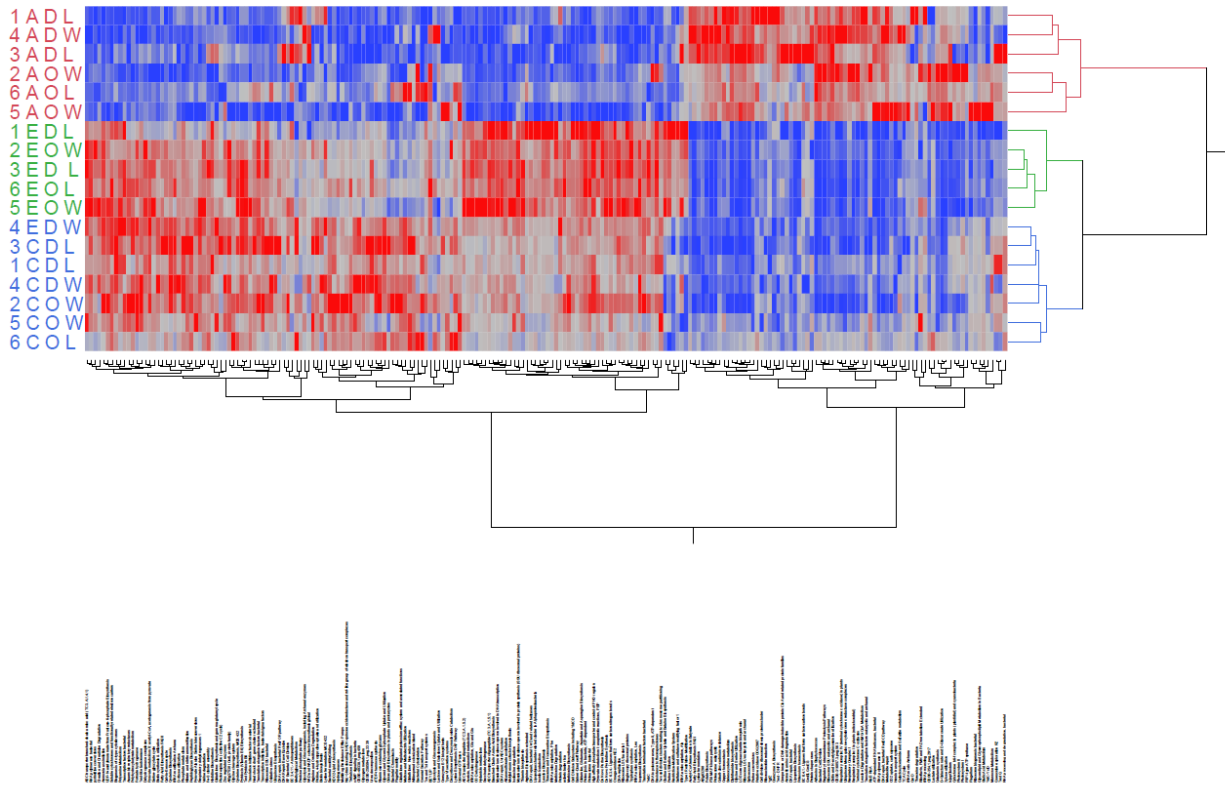

**Figure S3.** Two-way heat map constructed using functional genes at level 3 of the SEED hierarchical database. Green, red, and blue branches represent the three significant clusters. The branch tips are labeled to describe the site number (1-6), the sample type (C: coral, I: interface, A: algae), the type of coral (D = *D. stigosa*, O = *O. faveolata*), and whether the coral in the interaction was winning (W) or losing (L). Redder indicates relatively higher abundances and bluer indicates relatively lower abundances.

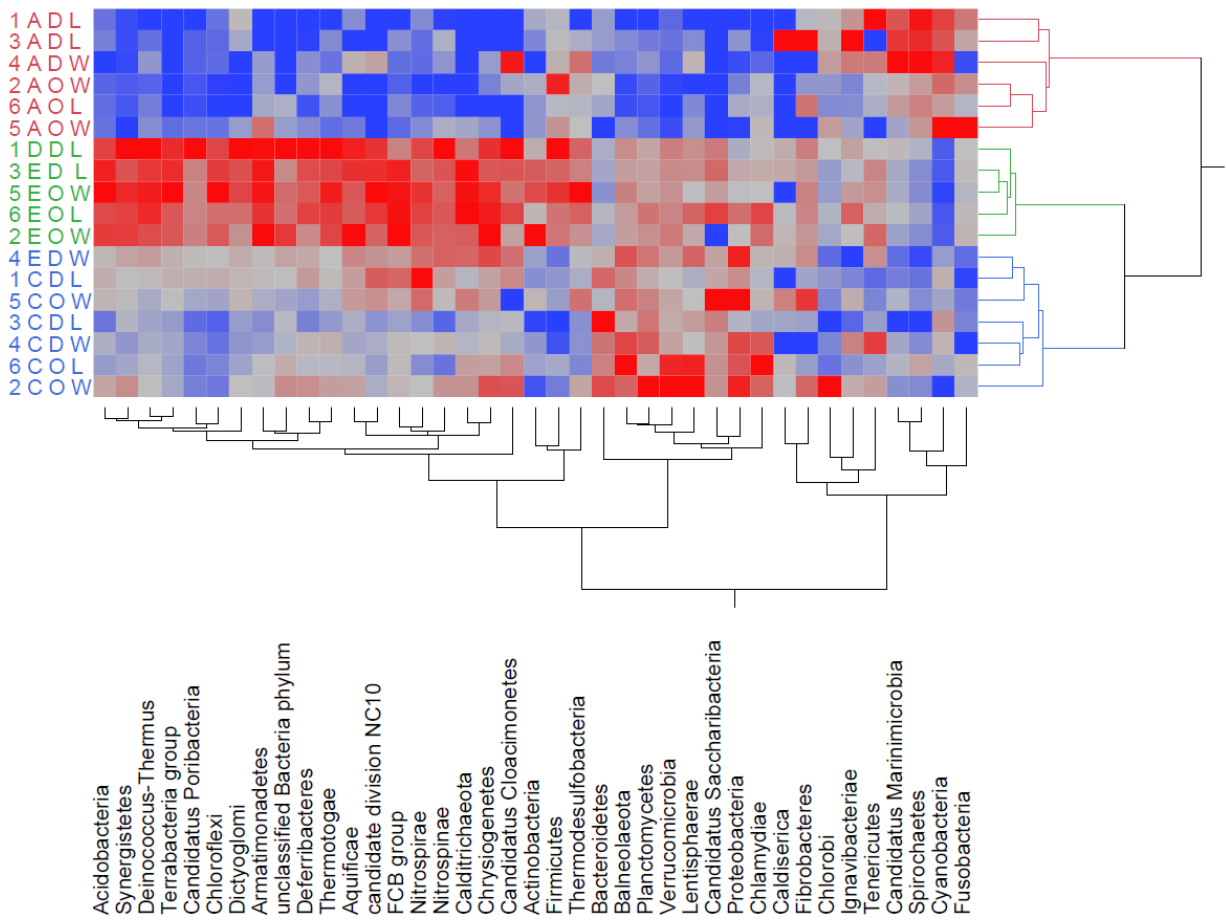

**Figure S4.** Two-way heat map constructed using bacterial phyla. Green, red, and blue represent branches the three significant clusters. The branch tips are labeled to describe the site number (1-6), the sample type (C: coral, I: interface, A: algae), the type of coral (D = *D. strigosa*, O = *O. faveolata*), and whether the coral in the interaction was winning (W) or losing (L). Redder indicates relatively higher abundances and bluer indicates relatively lower abundances.

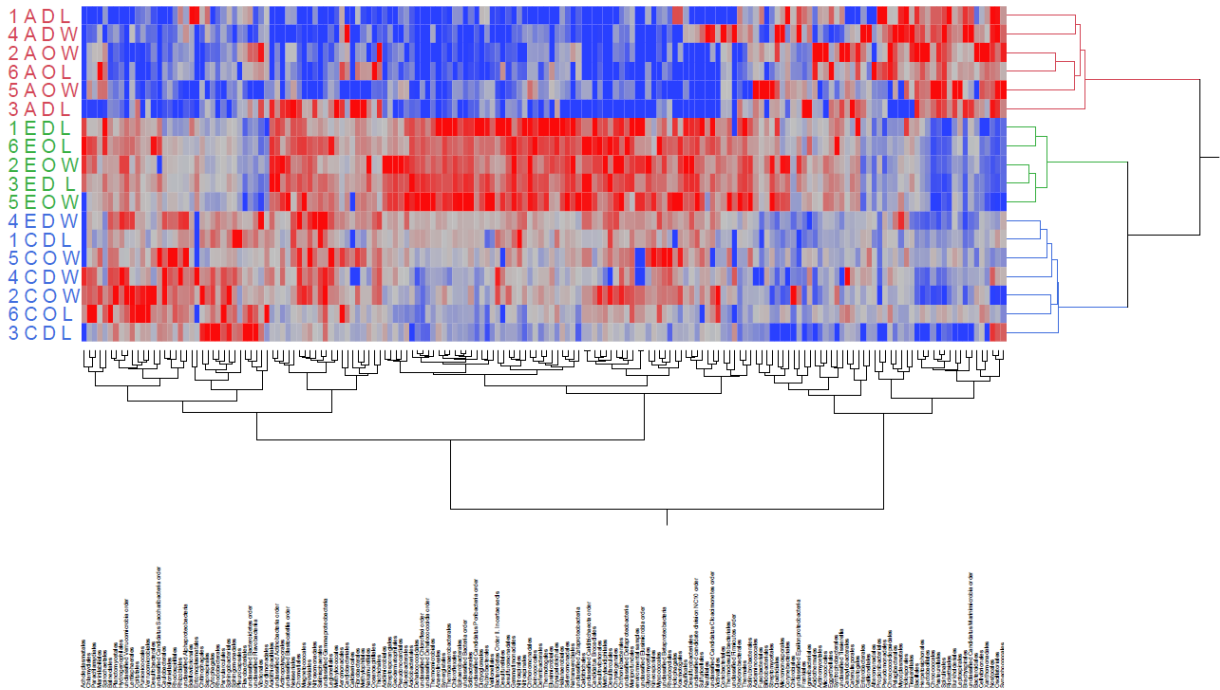

**Figure S5.** Two-way heat map constructed using bacterial orders. Green, red, and blue branches represent the three significant clusters. The branch tips are labeled to describe the site number (1-6), the sample type (C: coral, I: interface, A: algae), the type of coral (D = *D. strigosa*, O = *O. faveolata*), and whether the coral in the interaction was winning (W) or losing (L). Redder indicates relatively higher abundances and bluer indicates relatively lower abundances.

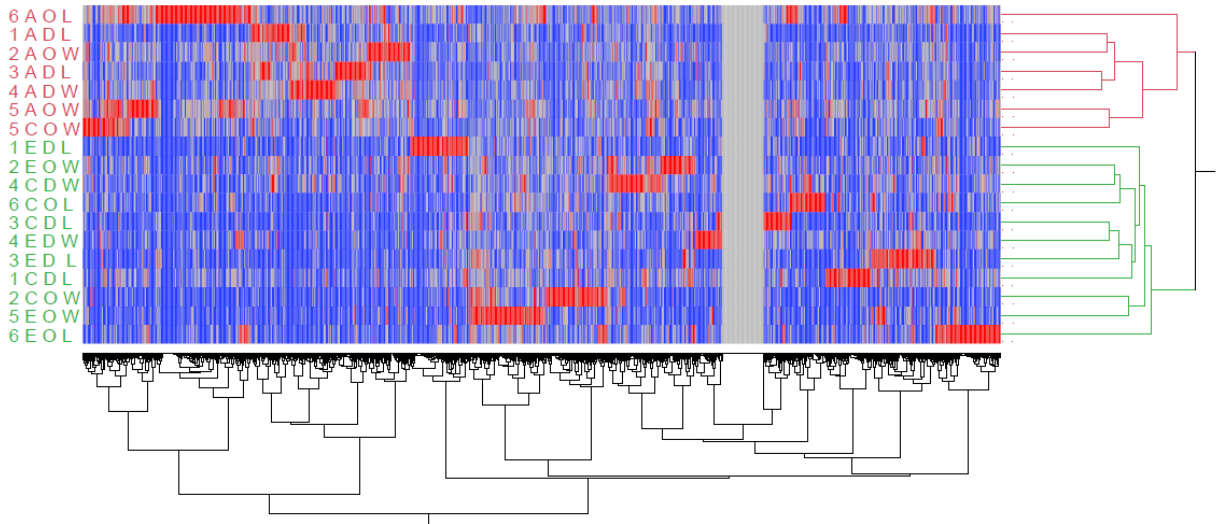

**Figure S6.** Two-way heat map constructed using metabolites. Green and red branches represent the two significant clusters. The branch tips are labeled to describe the site number (1-6), the sample type (C: coral, I: interface, A: algae), the type of coral (D = *D. stigosa*, O = *O. faveolata*, and whether the coral in the interaction was winning (W) or losing (L). Redder indicates relatively higher abundances and bluer indicates relatively lower abundances.

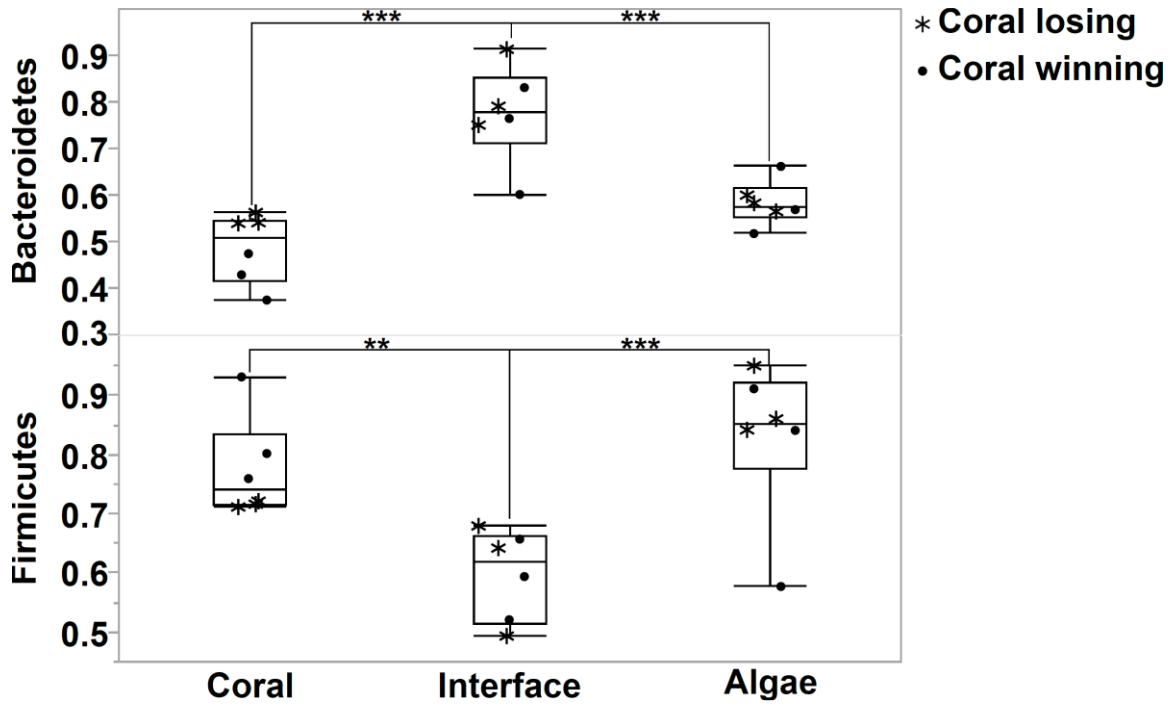

**Figure S7.** Box plots of the percent relative abundance of the two phyla where the interface samples were significantly different than both the coral and the algal samples. (N = 18, Tukey *post hoc* \*\*p ≤ 0.05, \*\*\*p ≤ 0.01)

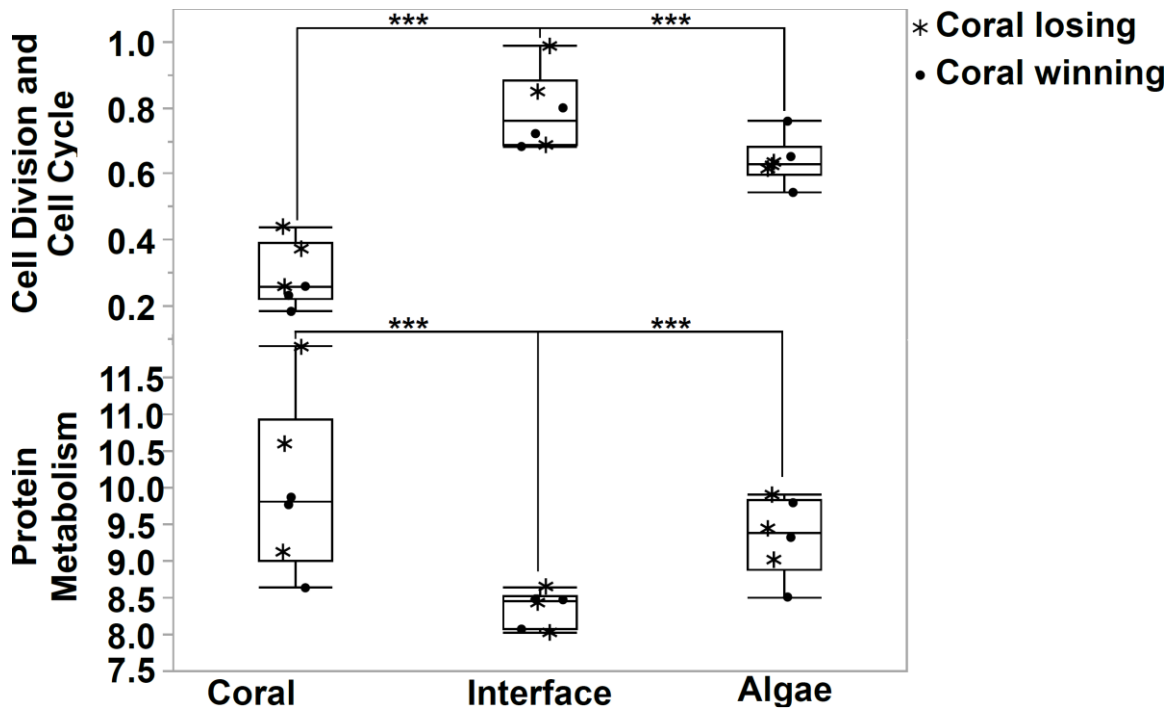

**Figure S8.** Box plots of the percent relative abundance of the two level 1 SEED subsystems where the interface samples were significantly different than both the coral and the algal samples. (N = 18, Tukey *post hoc*  $p \leq 0.1$ ,  $**p \leq 0.05$ ,  $***p \leq 0.01$ )

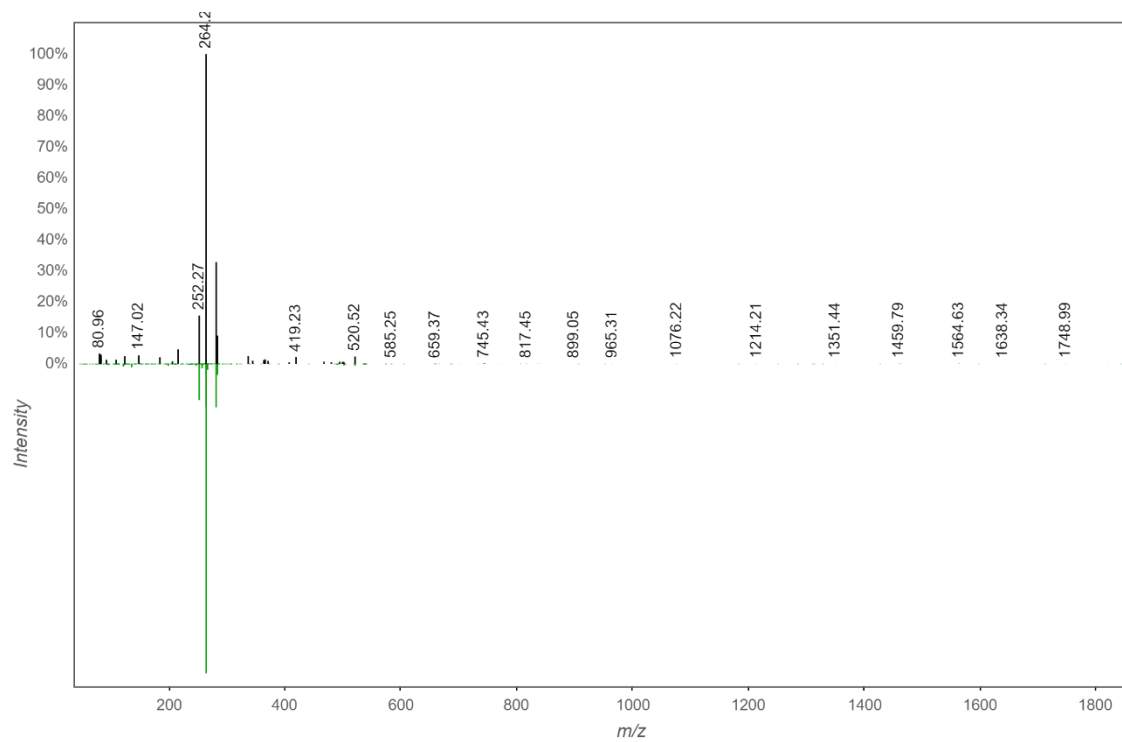

**Figure S9. Mirror plot of spectral match for ceramide 18:1/16:0.** The GNPS library reference is on the bottom in green with the spectra for the compound in the coral and interface samples is shown above in black. Note, the high intensity peak at 264.2 is decisive for the 18:0 backbone.



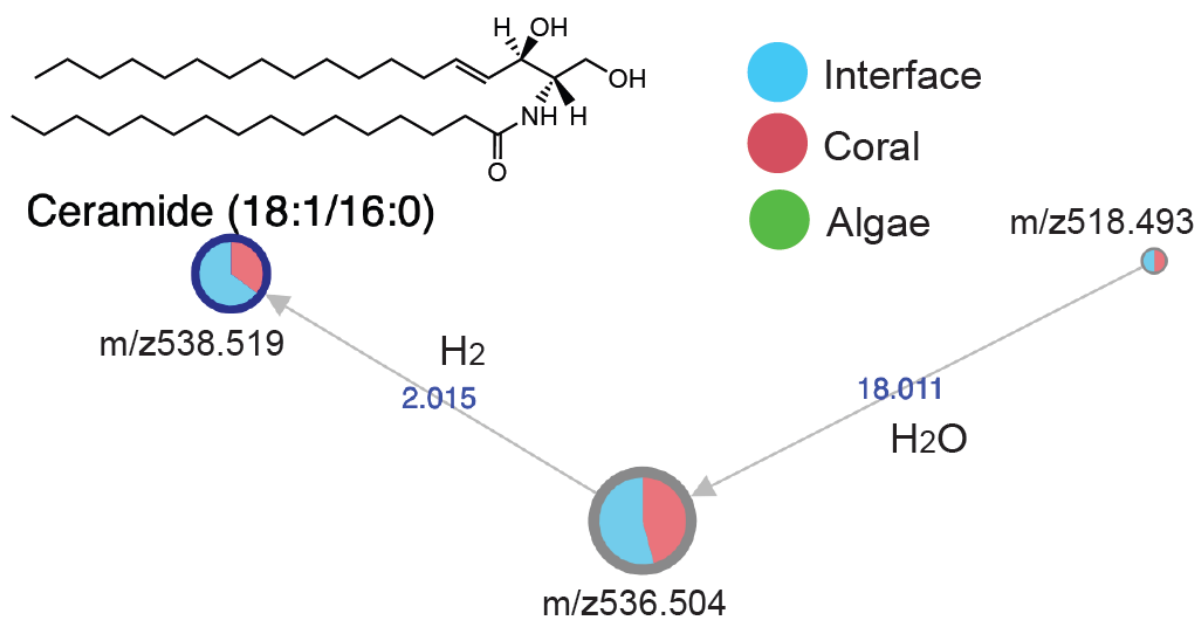

**Figure S10. Molecular network of ceramides in coral, algal, and interface metabolomics data from GNPS.** The structure of known ceramide is shown along with its less saturated form. Edges are labeled by the mass difference between related nodes and known biochemical transformations are highlighted. The nodes are colored in a pie chart based on the total spectral intensity between coral, algae, and interface according to the color legend.

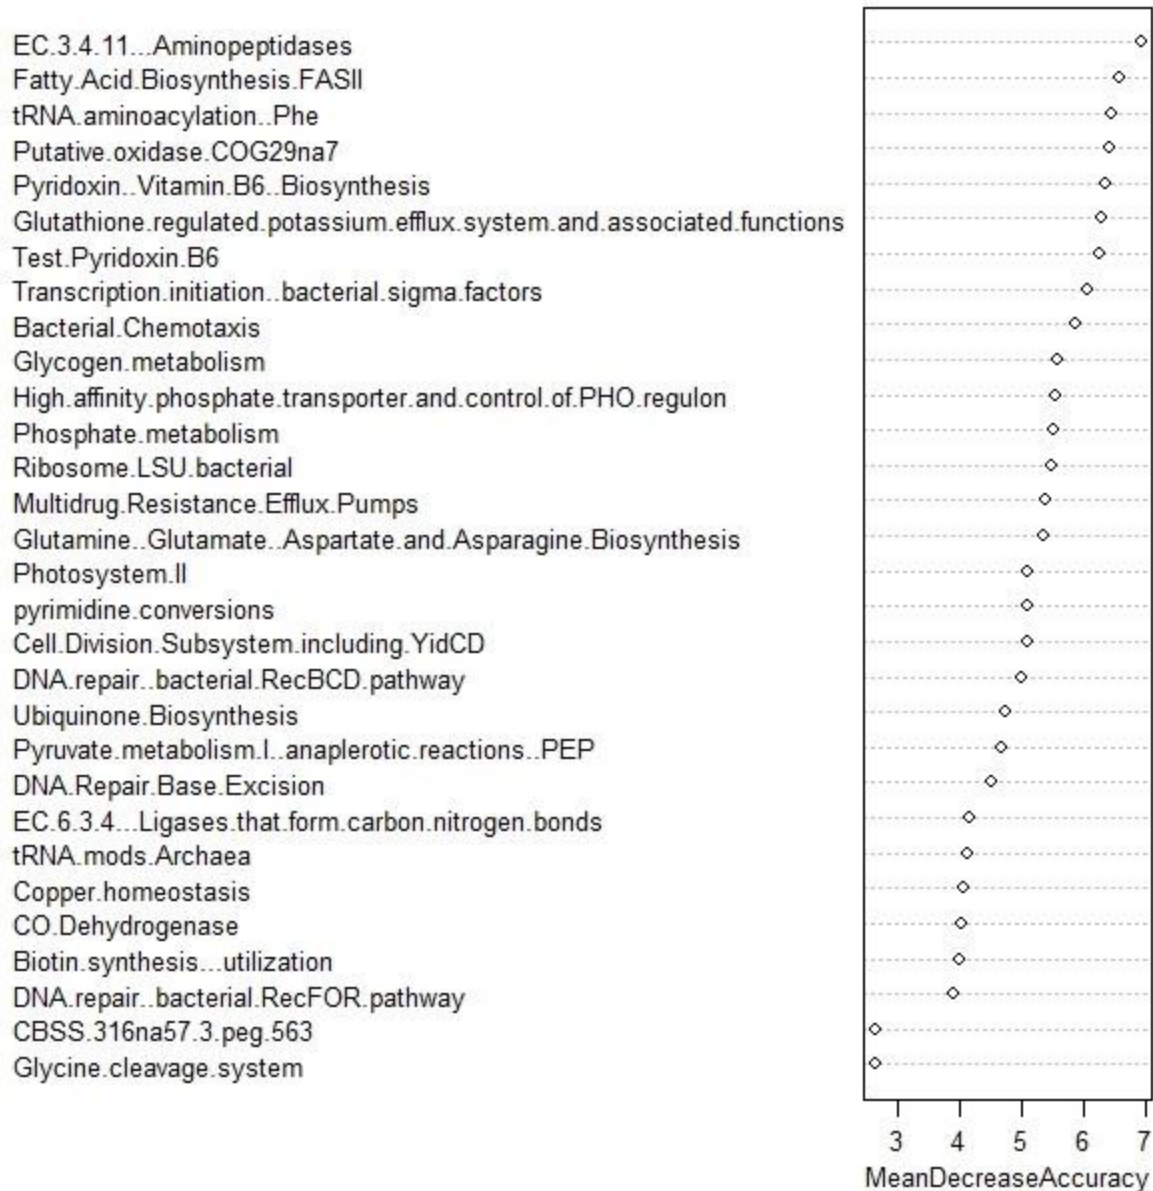

**Figure S11.** Variable importance plot of functional genes (SEED level 3) from random forest classification analysis based on winning and losing corals. Variable are ranked from highest to lowest according to their mean decrease in accuracy.

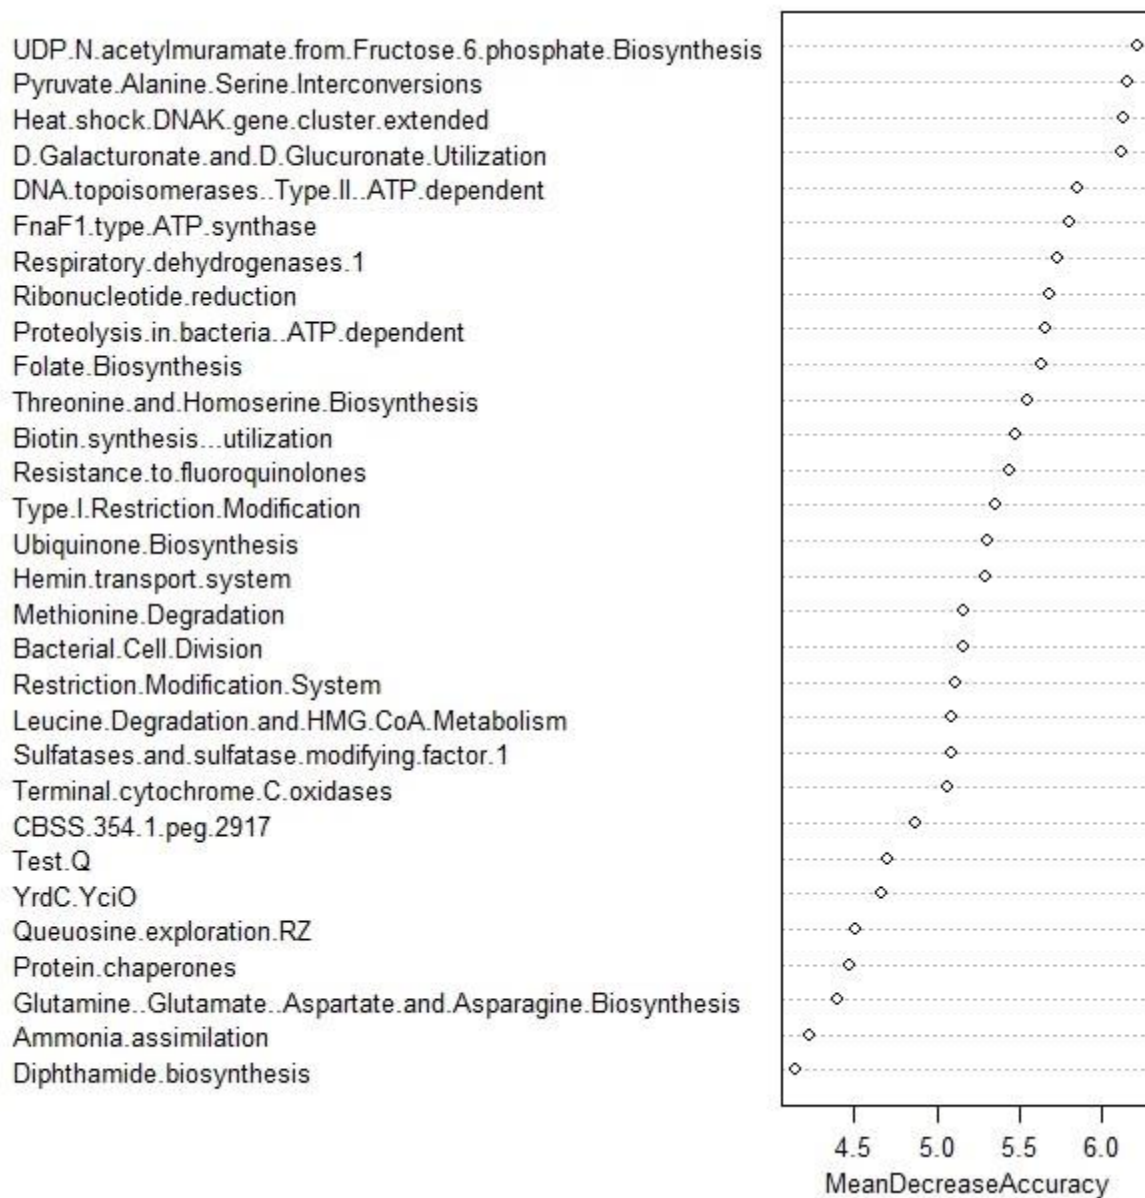

**Figure S12.** Variable importance plot of functional genes (SEED level 3) from random forest classification analysis based on winning and losing algae. Variable are ranked from highest to lowest according to their mean decrease in accuracy.

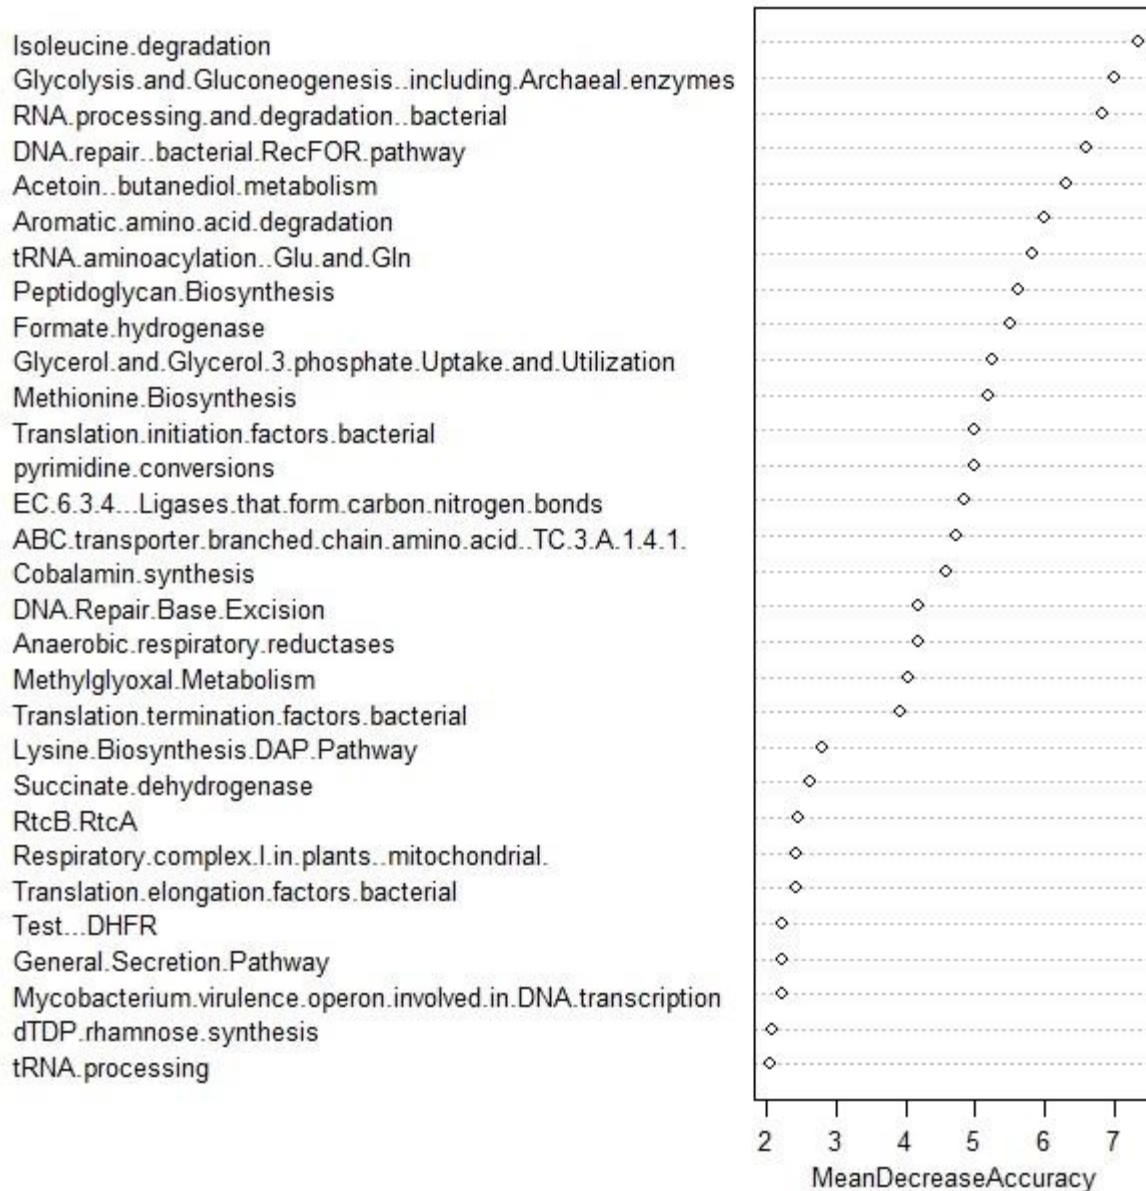

**Figure S13.** Variable importance plot of functional genes (SEED level 3) from random forest classification analysis based on winning and losing interfaces. Variable are ranked from highest to lowest according to their mean decrease in accuracy.

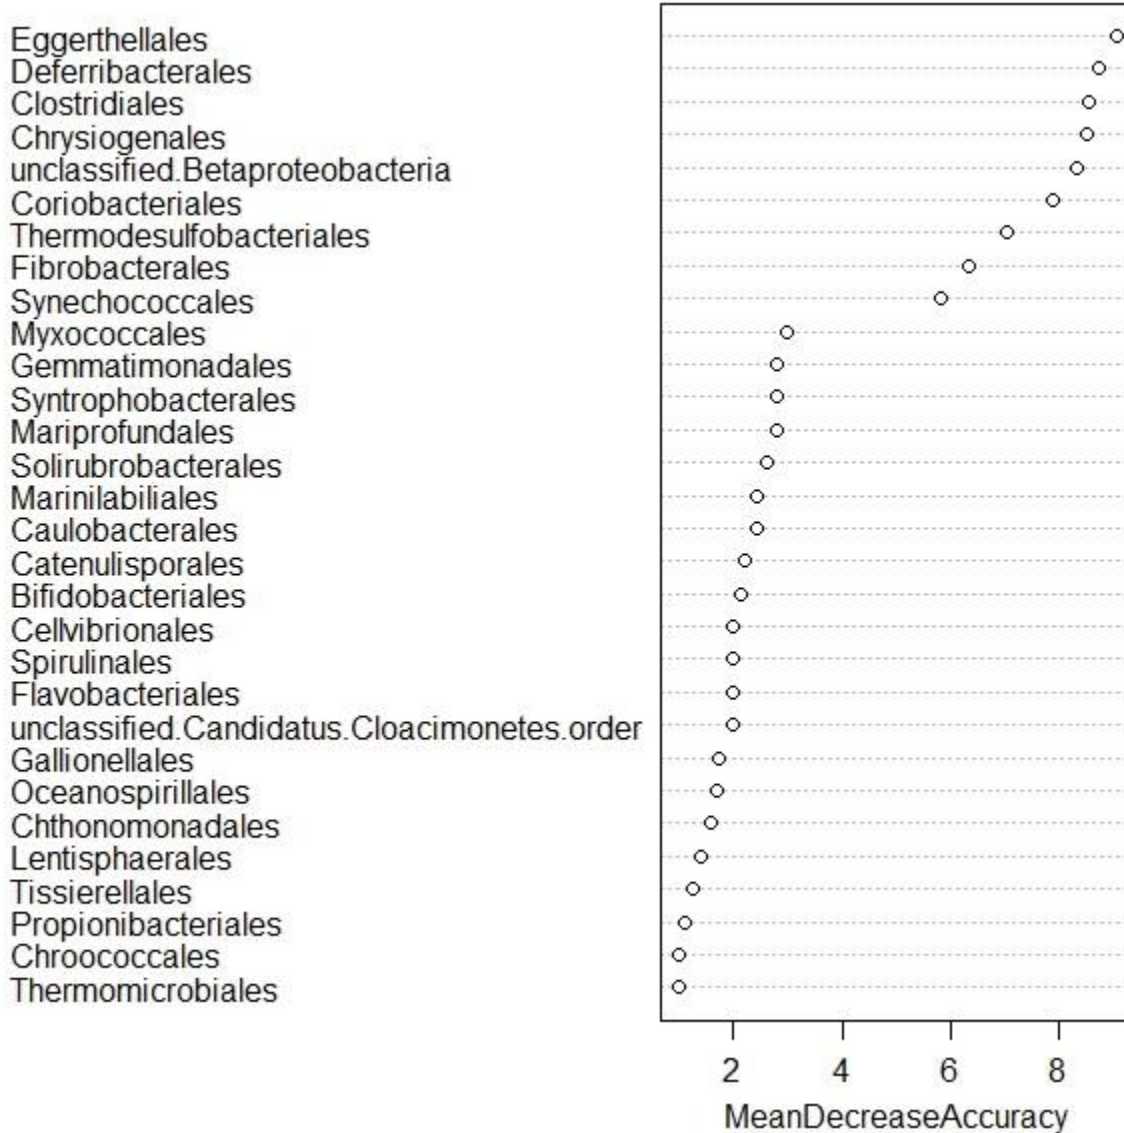

**Figure S14.** Variable importance plot of bacterial orders from random forest classification analysis based on winning and losing corals. Variable are ranked from highest to lowest according to their mean decrease in accuracy.

Tissierellales  
 Nitrospinales  
 unclassified.Candidatus.Saccharibacteria.order  
 Fusobacteriales  
 Bifidobacteriales  
 unclassified.Actinobacteria.order  
 Oceanospirillales  
 Deferribacterales  
 Pelagibacterales  
 Desulfurobacteriales  
 Desulfuromonadales  
 Methyacidiphilales  
 unclassified.Candidatus.Poribacteria.order  
 unclassified.Alphaproteobacteria  
 Spirochaetales  
 Kordiimonadales  
 Erysipelotrichales  
 Elusimicrobiales  
 Xnautiliales  
 Balneolales  
 Mariprofundales  
 unclassified.Betaproteobacteria  
 Mycoplasmatales  
 Acidithiobacillales  
 unclassified.Candidatus.Cloacimonetes.order  
 Acholeplasmatales  
 Vibrionales  
 Cellvibrionales  
 unclassified.Tissierellia  
 Veillonellales

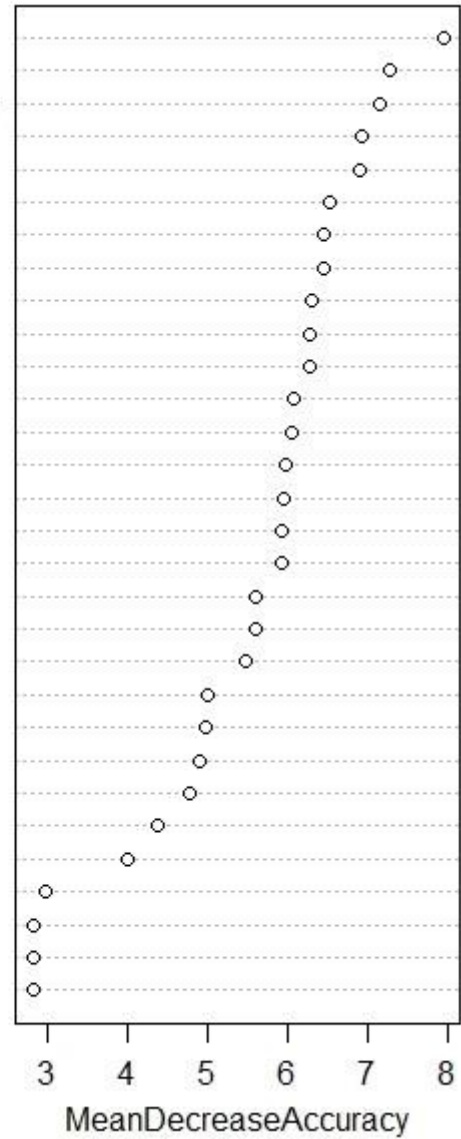

**Figure S15.** Variable importance plot of bacterial orders from random forest classification analysis based on winning and losing algae. Variable are ranked from highest to lowest according to their mean decrease in accuracy.



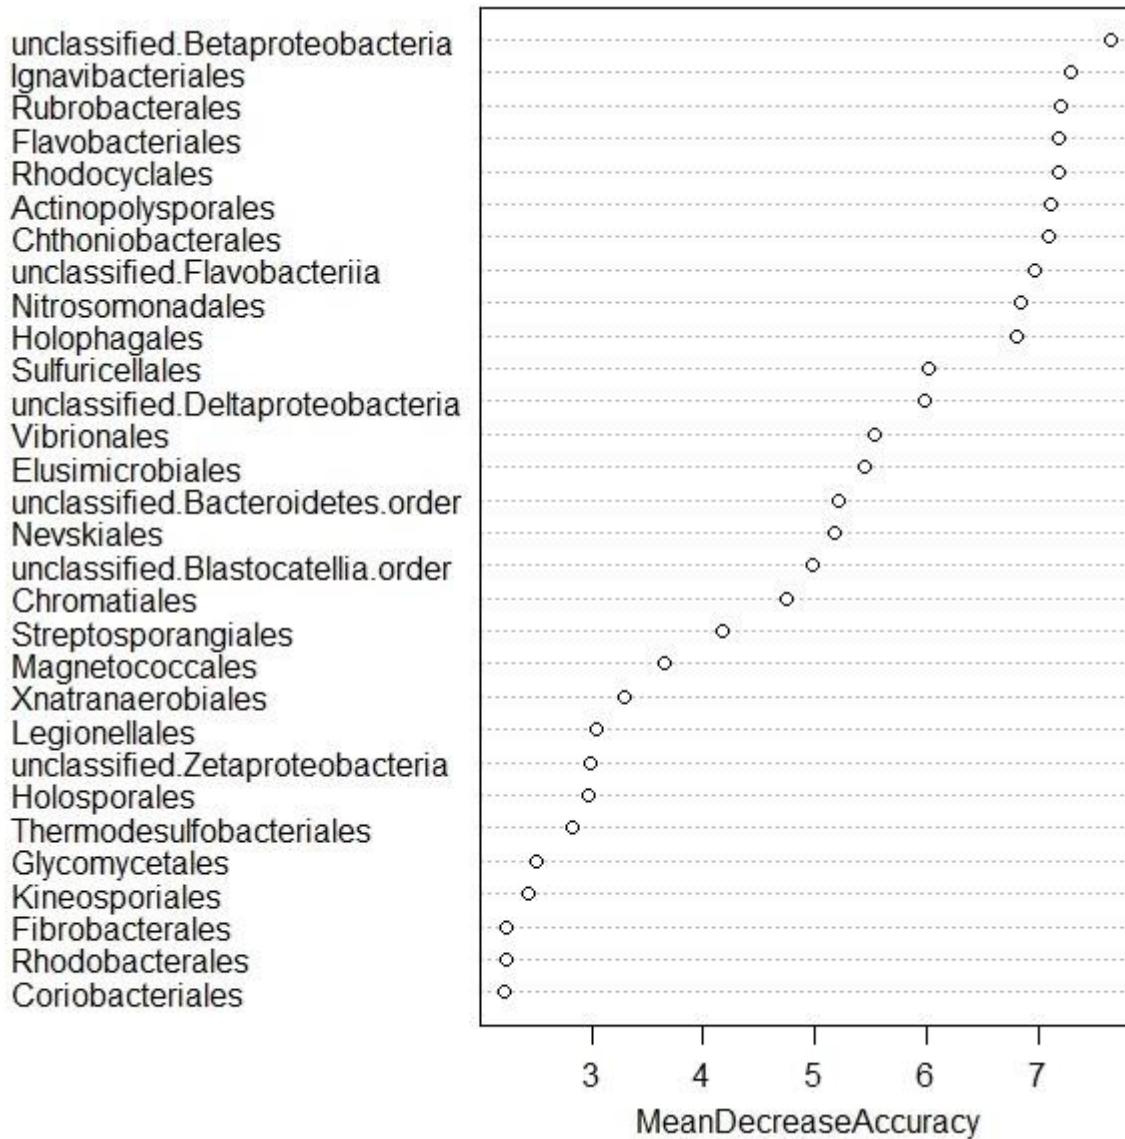

**Figure S16.** Variable importance plot of bacterial orders from random forest classification analysis based on winning and losing interfaces. Variable are ranked from highest to lowest according to their mean decrease in accuracy.

5116\_371.2313384\_7.190038456\_\_107\_C20H32N2O3  
 7360\_595.2630842\_7.635572063\_\_-1\_C19H41N8O10P  
 2197\_429.2383972\_6.342329167\_\_-1\_C13H32N8O8  
 213\_315.2281631\_6.956382719\_5(6)-EpETE methyl ester\_61\_C16H30N2O4  
 7589\_542.405199\_5.657836407\_\_-1\_C20H51N11O6  
 522\_355.2232378\_6.95063709\_\_30\_C18H30N2O5  
 1320\_180.0974364\_0.344875895\_\_87\_C6H13N4O  
 4169\_180.0969331\_0.265316042\_\_87\_C6H13N4O  
 4189\_497.3880564\_9.584541735\_\_377\_C19H48N10O5  
 5955\_439.3198438\_8.880832236\_\_-1\_C27H44O3  
 7600\_1083.811726\_5.654099795\_\_-1  
 3655\_673.8339512\_3.483967623\_\_-1\_C11H18N5O7P11  
 5916\_335.2265579\_6.390910314\_\_-1\_C13H28N8O  
 7851\_413.3391241\_9.29725526\_\_-1\_C13H40N12O3  
 927\_409.2680391\_6.906949932\_\_-1\_C17H36N4O7  
 2965\_639.2817381\_8.496636488\_\_173\_C36H38N4O7  
 7787\_644.5331071\_0.217858405\_\_-1\_C40H65N7  
 4758\_639.2843175\_8.306427937\_\_-1\_C34H40N4O7  
 6469\_389.2569914\_7.64953832\_\_-1\_C13H30N11O3  
 5003\_565.2946729\_6.776451913\_\_-1\_C20H41N10O7P  
 7688\_607.2711463\_7.826793443\_\_-1\_C34H34N6O5  
 2535\_317.2070489\_6.101103825\_\_349\_C16H24N6O  
 7268\_385.2660327\_7.775368716\_\_51\_C20H36N2O5  
 2534\_355.2427833\_6.774946311\_\_264\_C18H36O5  
 5910\_305.209863\_4.595807309\_\_-1\_C14H28N2O5  
 3990\_203.1092497\_4.476542008\_\_-1\_C3H10N10O  
 5802\_290.6745458\_0.185933019\_\_-1  
 8022\_253.2140632\_7.217129781\_\_187\_C12H28N3O  
 419\_371.2224085\_6.418347131\_\_110\_C15H29N7O2P  
 2167\_1585.628376\_4.540090632\_\_-1

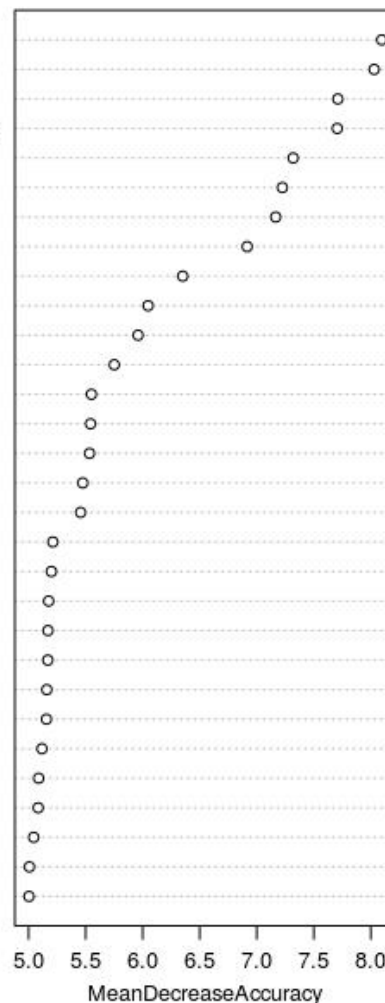

**Figure S17.** Variable importance plot of metabolites from random forest classification analysis based on winning and losing corals. Variable are ranked from highest to lowest according to their mean decrease in accuracy. The first number is the GNPS annotation number, the following number is the mass to charge ratio, the third number is the retention time, the fourth number is the network subcluster ID where -1 indicates a single looped compound. This is followed by the putative molecular formula for all molecules where annotation was possible.



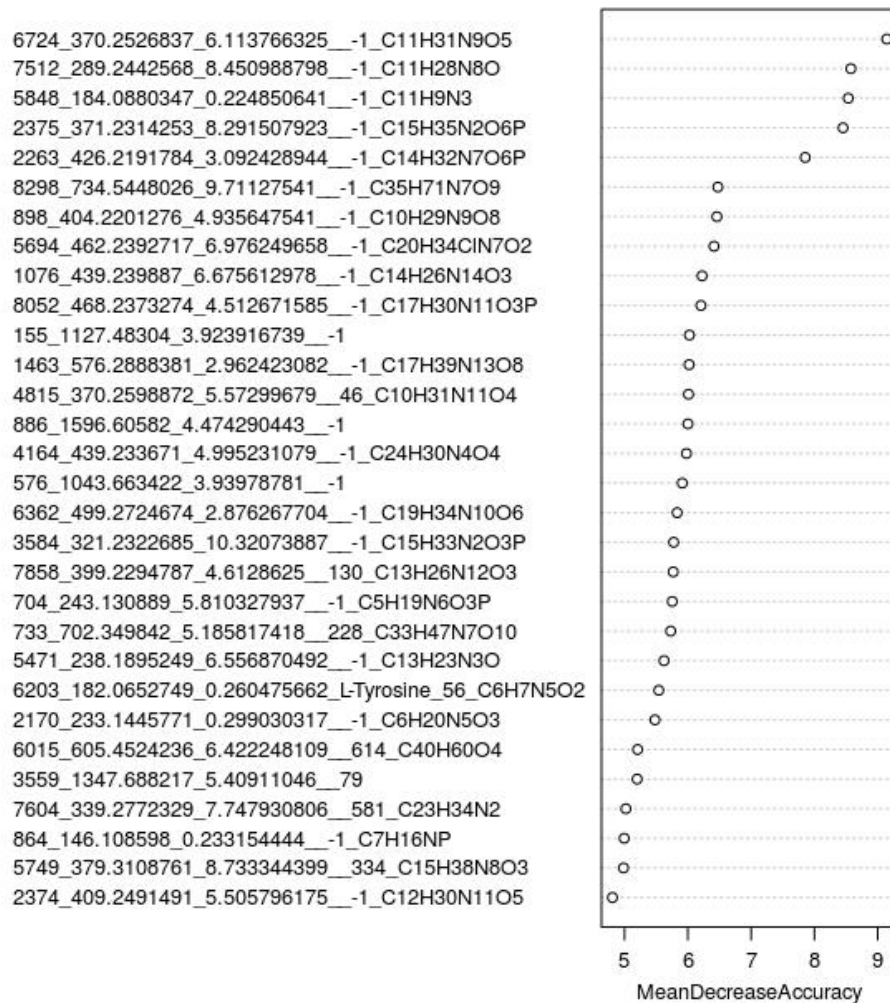

**Figure S18.** Variable importance plot of metabolites from random forest classification analysis based on winning and losing algae. Variable are ranked from highest to lowest according to their mean decrease in accuracy. The first number is the GNPS annotation number, the following number is the mass to charge ratio, the third number is the retention time, the fourth number is the network subcluster ID where -1 indicates a single looped compound. This is followed by the putative molecular formula for all molecules where annotation was possible.

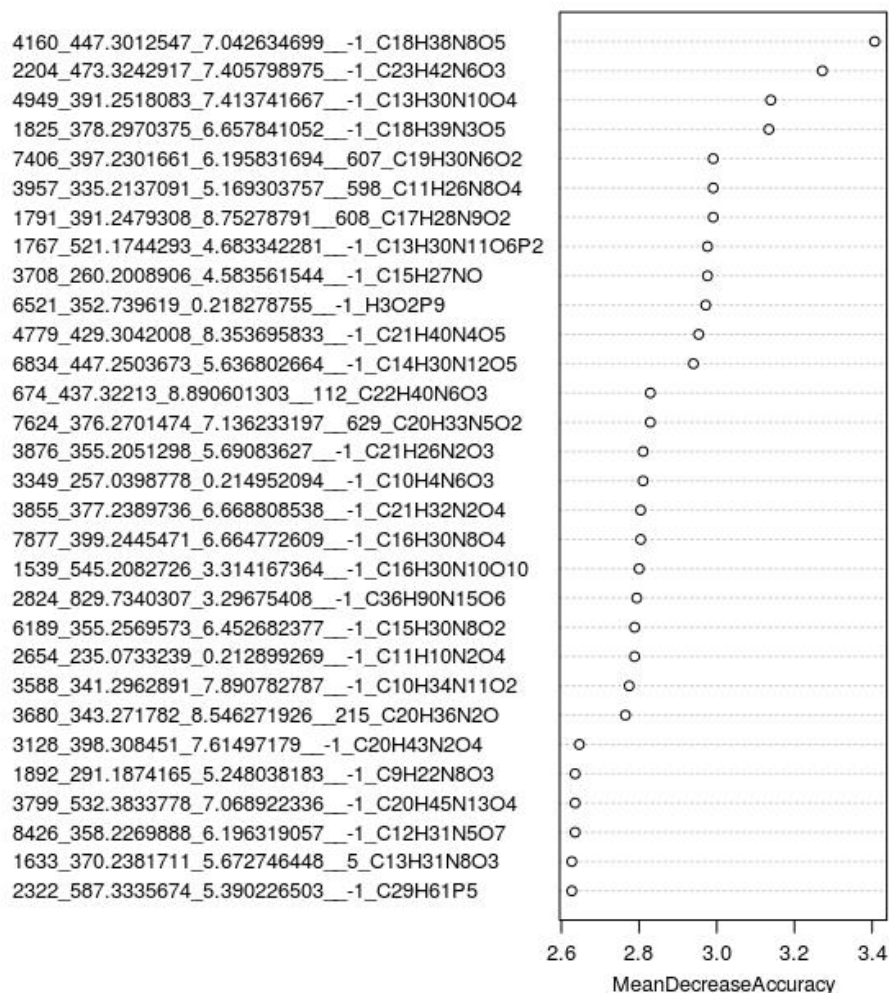

**Figure S19.** Variable importance plot of metabolites from random forest classification analysis based on winning and losing interfaces. Variable are ranked from highest to lowest according to their mean decrease in accuracy. The first number is the GNPS annotation number, the following number is the mass to charge ratio, the third number is the retention time, the fourth number is the network subcluster ID where -1 indicates a single looped compound. This is followed by the putative molecular formula for all molecules where annotation was possible.

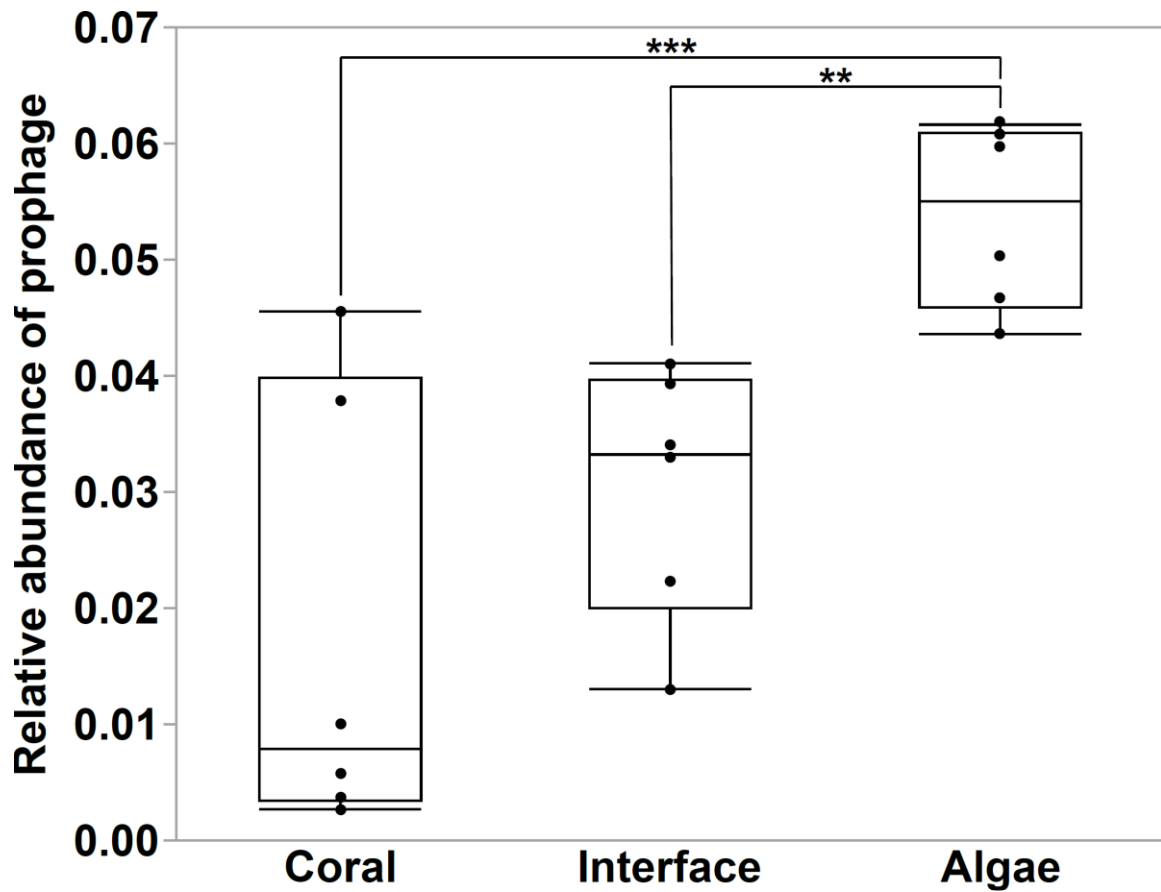

Figure S20. Relative abundance of prophages in metagenomes. (n = 18, \*\*P ≤ 0.05, \*\*\*P ≤ 0.01)

**Table S1:** Sample metadata.

| <b>Sample Site</b> | <b>Latitude</b> | <b>Longitude</b> | <b>Coral</b>        | <b>Algae</b> | <b>Competition type</b> |
|--------------------|-----------------|------------------|---------------------|--------------|-------------------------|
| <b>1</b>           | 12.06529        | -68.7606812      | <i>D.strigosa</i>   | Turf         | Coral losing            |
| <b>2</b>           | 12.0431461      | -68.767952       | <i>O. faveolata</i> | Turf         | Coral winning           |
| <b>3</b>           | 12.035203       | -68.795311       | <i>D.strigosa</i>   | Turf         | Coral losing            |
| <b>4</b>           | 12.050662       | -68.8342896      | <i>D.strigosa</i>   | Turf         | Coral winning           |
| <b>5</b>           | 12.1903019      | -69.0226288      | <i>O. faveolata</i> | Turf         | Coral winning           |
| <b>6</b>           | 12.2352629      | -69.1032791      | <i>O. faveolata</i> | Turf         | Coral losing            |

**Table S2: Site-level water chemistry data.** Site-level data including phosphate, nitrite, nitrite + nitrate, ammonium, and dissolved organic carbon (DOC) concentrations reported in micromolar ( $\mu\text{M}$ ). Note, there were no significant differences between coral species, or between competition outcomes for any of the site level variables recorded.

| Site | Coral type                                  | Phosphate ( $\mu\text{M}$ ) | Nitrite ( $\mu\text{M}$ ) | Nitrite + Nitrate ( $\mu\text{M}$ ) | Ammonium ( $\mu\text{M}$ ) | DOC ( $\mu\text{M}$ ) |
|------|---------------------------------------------|-----------------------------|---------------------------|-------------------------------------|----------------------------|-----------------------|
| 1    | <i>D. strigosa</i> losing                   | 0.04495                     | 0.17145                   | 0.3715                              | 1.029255                   | 69.66                 |
| 2    | <i>O. faveolata</i> winning                 | 0.0955                      | 0.1813                    | 0.466                               | 0.33099                    | 67.96                 |
| 3    | <i>D. strigosa</i> losing                   | 0.13575                     | 0.8605                    | 9.22                                | 1.1420925                  | 79.08                 |
| 4    | <i>D. strigosa</i> winning                  | 0.010011                    | 0.08565                   | 0.4925                              | 0.934164                   | 72.89                 |
| 5    | <i>O. faveolata</i> winning                 | 0.0546                      | 0.179                     | 0.342                               | 2.325                      | 91.05                 |
| 6    | <i>O. faveolata</i> losing                  | 0.123                       | 0.1828                    | 1.325                               | 8.18537                    |                       |
|      | <b>ANOVA p-value for winning and losing</b> | <b>0.2722</b>               | <b>0.3276</b>             | <b>0.3168</b>                       | <b>0.4075</b>              | <b>0.7828</b>         |
|      | <b>ANOVA p-value for coral species</b>      | <b>0.5526</b>               | <b>0.4785</b>             | <b>0.491</b>                        | <b>0.3356</b>              | <b>0.5883</b>         |

**Table S3:** Metagenomic library details. Just as in the main text, sample names are labeled to describe the site number (1-6), the sample type (C: coral, I: interface, A: algae), the type of coral (D = *D. strigosa*, O = *O. faveolata*, and whether the coral in the interaction was winning (W) or losing (L).

| Sample name | # of reads pre QC | # of reads post QC | Host (%)  | Host (reads) | Bacteria (%) | Bacteria (reads) | Protist (%) | Protist (reads) | Archaea (%) | Archaea (reads) | Virus (%)   | Virus (reads) | Unclassified (%) | Unclassified (reads) |
|-------------|-------------------|--------------------|-----------|--------------|--------------|------------------|-------------|-----------------|-------------|-----------------|-------------|---------------|------------------|----------------------|
| 1 C D L     | 1465793           | 1419816            | 98.360078 | 1441755      | 0.822430512  | 11677            | 0.309142045 | 4389            | 0.003168882 | 45              | 0.162685161 | 2310          | 0.342495077      | 4863                 |
| 1 I D L     | 793526            | 758160             | 93.865282 | 744845       | 4.866123246  | 36893            | 0.268904149 | 2039            | 0.067390888 | 511             | 0.100276438 | 760           | 0.832023416      | 6308                 |
| 1 A D L     | 230067            | 223401             | 74.958626 | 172455       | 23.56703864  | 52649            | 0.198268001 | 443             | 0.626580589 | 1400            | 0.028486241 | 64            | 0.621000057      | 1387                 |
| 2 C O W     | 2572816           | 2501413            | 97.780174 | 2515704      | 0.931913283  | 23311            | 0.288824359 | 7225            | 0.012472415 | 312             | 0.454701441 | 11374         | 0.531914894      | 13305                |
| 2 I O W     | 653428            | 619257             | 86.592579 | 565820       | 12.15182065  | 75251            | 0.242190361 | 1500            | 0.216195263 | 1339            | 0.034545986 | 214           | 0.762669076      | 4723                 |
| 2 A O W     | 965669            | 928129             | 62.153498 | 600197       | 36.21737927  | 336144           | 0.193882033 | 1799            | 0.570982588 | 5299            | 0.057399135 | 533           | 0.806859345      | 7489                 |
| 3 C D L     | 1063274           | 1058088            | 98.043386 | 1042470      | 1.05662289   | 11180            | 0.385850215 | 4083            | 0.004347076 | 46              | 0.044718719 | 473           | 0.46507468       | 4921                 |
| 3 I D L     | 879219            | 852962             | 71.925365 | 632381       | 26.49121532  | 225960           | 0.40033795  | 3415            | 0.061175764 | 522             | 0.053971793 | 460           | 1.067933677      | 9109                 |
| 3 A D L     | 1088614           | 1050354            | 69.91405  | 761094       | 28.58255407  | 300218           | 0.23912003  | 2512            | 0.517934747 | 5440            | 0.029307445 | 308           | 0.717033287      | 7531                 |
| 4 C D W     | 1656496           | 1610586            | 97.905338 | 1621798      | 0.802130405  | 12919            | 0.3141605   | 5060            | 0.003289964 | 53              | 0.448846928 | 7229          | 0.526234329      | 8475                 |
| 4 I D W     | 429451            | 416244             | 91.112385 | 391283       | 7.135718473  | 29702            | 0.30433754  | 1267            | 0.151568262 | 631             | 0.09425388  | 392           | 1.201736964      | 5002                 |
| 4 A D W     | 661053            | 644422             | 84.79583  | 560545       | 13.30339436  | 85730            | 0.397759934 | 2563            | 0.287926068 | 1855            | 0.298524867 | 1924          | 0.916564632      | 5907                 |
| 5 C O W     | 1532535           | 1511462            | 98.335849 | 1507031      | 0.954373977  | 14425            | 0.309591059 | 4679            | 0.005093699 | 77              | 0.06931448  | 1048          | 0.325778055      | 4924                 |
| 5 I O W     | 900394            | 874791             | 95.852206 | 863048       | 3.009175906  | 26324            | 0.279785127 | 2448            | 0.065031755 | 569             | 0.0569714   | 498           | 0.736830111      | 6446                 |
| 5 A O W     | 144160            | 141209             | 64.66567  | 93222        | 33.55593482  | 47384            | 0.19826254  | 280             | 0.898554152 | 1269            | 0.044313146 | 63            | 0.637265246      | 900                  |
| 6 C O L     | 1628373           | 1572820            | 98.262022 | 1600072      | 1.028725474  | 16180            | 0.279827568 | 4401            | 0.003051277 | 48              | 0.191559043 | 3013          | 0.234814311      | 3693                 |
| 6 I O L     | 2141143           | 2072880            | 96.768028 | 2071942      | 2.207025974  | 45749            | 0.298195918 | 6181            | 0.007812993 | 162             | 0.059000918 | 1223          | 0.659936192      | 13680                |
| 6 A O L     | 582502            | 563257             | 74.603599 | 434567       | 24.48047315  | 137888           | 0.153719635 | 866             | 0.575649857 | 3242            | 0.006745203 | 38            | 0.179812922      | 1013                 |
| TOTAL       | 19388513          | 18819251           |           | 17620231     |              | 1489584          |             | 55149           |             | 22820           |             | 31923         |                  | 109676               |
| MEAN        | 1077139.611       | 1045513.944        | 86.43855  | 978901.7     | 12.286892    | 82755            | 0.2812311   | 3064            | 0.2265681   | 1268            | 0.1242012   | 1774          | 0.642554237      | 6093                 |

**Table S4: Microbial taxa that are significantly enriched in winning and losing interactions.**  
 Prokaryotic orders of bacteria that were significantly enriched as determined ANOVA are listed in the first column with the ANOVA p-value listed in the second column.

| <b>Enriched in winning corals</b>              | <b>p-value (one-way ANOVA)</b> | <b>Notes</b>                     |
|------------------------------------------------|--------------------------------|----------------------------------|
| Deferribacterales                              | 0.0004                         | Obligate anaerobes               |
| Chrysiogenales                                 | 0.0006                         | Anoxic chemoautotrophs           |
| Clostridiales                                  | 0.0131                         | Obligate anaerobes               |
| Synechococcales                                | 0.0210                         | Cyanobacteria                    |
|                                                |                                |                                  |
| <b>Enriched in losing corals</b>               | <b>p-value (one-way ANOVA)</b> | <b>Notes</b>                     |
| Unclassified Betaproteobacteria                | 0.0006                         | Mostly anaerobic                 |
| Fibrobacterales                                | 0.0251                         | Super heterotroph                |
| Eggerthellales                                 | 0.0324                         | Mostly anaerobic                 |
|                                                |                                |                                  |
| <b>Enriched in winning interfaces</b>          | <b>p-value (one-way ANOVA)</b> | <b>Notes</b>                     |
| Rubrobacterales                                | 0.0083                         |                                  |
| Ignavibacterales                               | 0.0084                         | Anaerobic chemoautotrophs        |
| Actinopolysporales                             | 0.0139                         |                                  |
| Unclassified Betaproteobacteria                | 0.0170                         |                                  |
| Rhodocyclales                                  | 0.0216                         | Denitriphyers                    |
| Nitrosomonadales                               | 0.0251                         | Chemoautotrophs                  |
| Chromatiales                                   | 0.0275                         | Anaerobic purple sulfur bacteria |
| Unclassified Deltaproteobacteria               | 0.0279                         |                                  |
| Chthoniobacterales                             | 0.0281                         |                                  |
| Holophagales                                   | 0.0377                         | Anaerobes                        |
| Elusimicrobiales                               | 0.0494                         | Obligate anaerobes               |
|                                                |                                |                                  |
| <b>Enriched in losing interfaces</b>           | <b>p-value (one-way ANOVA)</b> | <b>Notes</b>                     |
| Unclassified Flavobacteriia                    | 0.0126                         | Opportunistic pathogens          |
| Flavobacteriales                               | 0.0165                         | Opportunistic pathogens          |
| Unclassified Bacteroidetes                     | 0.0346                         |                                  |
| Vibrionales                                    | 0.0430                         | Opportunistic pathogens          |
|                                                |                                |                                  |
| <b>Enriched in algae when coral is winning</b> | <b>p-value (one-way ANOVA)</b> | <b>Notes</b>                     |
| Balneodales                                    | 0.0235                         |                                  |
| Oceanospirillales                              | 0.0351                         |                                  |
|                                                |                                |                                  |
| <b>Enriched in algae when coral is losing</b>  | <b>p-value (one-way ANOVA)</b> | <b>Notes</b>                     |
| Erysipelotrichales                             | 0.0147                         |                                  |
| Methylacidiphilales                            | 0.0166                         |                                  |
| Candidatus Saccharibacteria                    | 0.0248                         |                                  |
| Tissierellales                                 | 0.0362                         |                                  |
| Unclassified Betaproteobacteria                | 0.0414                         |                                  |
| Unclassified Actinobacteria                    | 0.0432                         |                                  |
| Elusimicrobiales                               | 0.0488                         |                                  |

**Table S5: Functional genes that are significantly enriched in winning and losing interactions.** Functional genes from Level 3 of the SEED database that were significantly enriched as determined by ANOVA are listed in the first column with the ANOVA p-value listed in the second column.

| <b>Enriched in winning corals</b>                        | <b>p-value (one-way ANOVA)</b> | <b>Notes</b> |
|----------------------------------------------------------|--------------------------------|--------------|
| DNA repair, bacterial RecBCD pathway                     | 0.0381                         |              |
|                                                          |                                |              |
| <b>Enriched in losing corals</b>                         | <b>p-value (one-way ANOVA)</b> | <b>Notes</b> |
| tRNA Aminoacylation, Phe                                 | 0.0002                         |              |
| High affinity phosphate transporter and control of PHO   | 0.0010                         |              |
| Putative oxidase COG2907                                 | 0.0021                         |              |
| EC 3.4.11.-Aminopeptidases                               | 0.0036                         |              |
| Fatty acid biosynthesis FASII                            | 0.0050                         |              |
| Phosphate metabolism                                     | 0.0106                         |              |
| Test Pyridoxin B6                                        | 0.0174                         |              |
| Pyridoxin (B6) biosynthesis                              | 0.0185                         |              |
| Biotin synthesis and utilization                         | 0.0411                         |              |
|                                                          |                                |              |
| <b>Enriched in winning interfaces</b>                    | <b>p-value (one-way ANOVA)</b> | <b>Notes</b> |
| Glycolysis and gluconeogenesis                           | 0.0008                         |              |
| Isoleucine degradation                                   | 0.0060                         |              |
| Acetoin and butenediol metabolism                        | 0.0081                         |              |
| Methionine biosynthesis                                  | 0.0143                         |              |
| ABC transporter branched chain amino acid (TC 3.A.1.4.1) | 0.0289                         |              |
| Aromatic amino acid degradation                          | 0.0433                         |              |
| DNA repair base excision                                 | 0.0461                         |              |
|                                                          |                                |              |
| <b>Enriched in losing interfaces</b>                     | <b>p-value (one-way ANOVA)</b> | <b>Notes</b> |
| RNA processing and degradation, bacterial                | 0.0247                         |              |
| Peptidoglycan synthesis                                  | 0.0440                         |              |
| Methylglyoxal metabolism                                 | 0.048                          |              |
|                                                          |                                |              |
| <b>Enriched in algae when coral is winning</b>           | <b>p-value (one-way ANOVA)</b> | <b>Notes</b> |
| Folate biosynthesis                                      | 0.0030                         |              |
| UDP-N-acetylmuramate from fructose-6-phosphate           | 0.0045                         |              |
| CBSS-354.1.peg.2917                                      | 0.0164                         |              |
| pyruvate alanine serine interconversions                 | 0.0272                         |              |
| Bacterial cell division                                  | 0.0335                         |              |
| respiratory dehydrogenase 1                              | 0.0384                         |              |
| YrdC-YciO                                                | 0.0456                         |              |
| Ribonucleotide reduction                                 | 0.0470                         |              |



## References

1. T. McDole, *et al.*, Assessing coral reefs on a Pacific-wide scale using the microbialization score. *PLoS One* **7**, e43233 (2012).
2. R. Schmieder, R. Edwards, Quality control and preprocessing of metagenomic datasets. *Bioinformatics* **27**, 863–864 (2011).
3. G. G. Z. Silva, K. T. Green, B. E. Dutilh, R. A. Edwards, SUPER-FOCUS: a tool for agile functional analysis of shotgun metagenomic data. *Bioinformatics* **32**, 354–361 (2016).
4. R. Overbeek, *et al.*, The SEED and the Rapid Annotation of microbial genomes using Subsystems Technology (RAST). *Nucleic Acids Res.* **42**, D206–14 (2014).
5. H. Ponstingl, Z. Ning, SMALT-a new mapper for DNA sequencing reads. *F1000 Posters* **1** (2010).
6. S. Akhter, R. K. Aziz, R. A. Edwards, PhiSpy: a novel algorithm for finding prophages in bacterial genomes that combines similarity- and composition-based strategies. *Nucleic Acids Res.* **40**, e126 (2012).
7. K. D. Pruitt, T. Tatusova, D. R. Maglott, NCBI reference sequences (RefSeq): a curated non-redundant sequence database of genomes, transcripts and proteins. *Nucleic Acids Res.* **35**, D61–5 (2007).
8. T. Pluskal, S. Castillo, A. Villar-Briones, M. Oresic, MZmine 2: modular framework for processing, visualizing, and analyzing mass spectrometry-based molecular profile data. *BMC Bioinformatics* **11**, 395 (2010).
9. F. Olivon, G. Grelier, F. Roussi, M. Litaudon, D. Touboul, MZmine 2 data-preprocessing to enhance molecular networking reliability. *Anal. Chem.* **89**, 7836–7840 (2017).
10. E. B. Graham, *et al.*, Carbon inputs from riparian vegetation limit oxidation of physically bound organic carbon via biochemical and thermodynamic processes. *Journal of Geophysical Research: Biogeosciences* **122**, 3188–3205 (2017).
11. D. E. LaRowe, P. Van Cappellen, Degradation of natural organic matter: A thermodynamic analysis. *Geochim. Cosmochim. Acta* **75**, 2030–2042 (2011).
12. E. Archer, rfPermute: estimate permutation p-values for Random Forest importance metrics. *R package (Zenodo)*, Version, 2(1) (2016).
